# Supplementary material for: Detection of Fetomaternal Genotype Associations in Early-Onset Disorders: Evaluation of Different Methods and Their Application to Childhood Leukemia
Source: Hindawi journal article supplement (doi:10.1155/2010/369534), 2010-01-01
Supplement: f3 [file 369534.f3.pdf]

**Supplementary Table 1.** Log-linear, likelihood-ratio association analysis between 29 regulatory SNPs from 12 cell-cycle genes and childhood pre-B ALL.

| Gene,<br>DNA variant | Model                       | LR Chi2 (df) | P             |
|----------------------|-----------------------------|--------------|---------------|
| <b>CCND1</b>         |                             |              |               |
| rs1944129            | Child vs. Null              | 1.2295 (2)   | 0.5408        |
|                      | Mother vs. Null             | 2.1512 (2)   | 0.3411        |
| rs36225395           | Child vs. Null              | 0.4281 (2)   | 0.8073        |
|                      | Mother vs. Null             | 1.7239 (2)   | 0.4223        |
| <b>CDC25a</b>        |                             |              |               |
| rs1903061            | Child vs. Null              | 0.2266 (2)   | 0.8929        |
|                      | Mother vs. Null             | 0.2315 (2)   | 0.8907        |
| <b>CDKN1A</b>        |                             |              |               |
| rs733590             | Child vs. Null              | 2.5003 (2)   | 0.2865        |
|                      | Mother vs. Null             | 2.6508 (2)   | 0.2657        |
| rs762624             | Child vs. Null              | 0.3833 (2)   | 0.8256        |
|                      | Mother vs. Null             | 1.9700 (2)   | 0.3734        |
| rs2395655            | Child vs. Null              | 1.8532 (2)   | 0.3959        |
|                      | Mother vs. Null             | 1.9417 (2)   | 0.3788        |
| <b>CDKN1B</b>        |                             |              |               |
| rs3759217            | Child vs. Null              | 1.8690 (2)   | 0.3928        |
|                      | Mother vs. Null             | 0.7517 (2)   | 0.6867        |
| rs35756741           | Child vs. Null              | 7.5044 (2)   | 0.0235        |
|                      | Mother vs. Null             | 1.2860 (2)   | 0.5257        |
|                      | Child + Mother vs.<br>Null  | 8.5604 (4)   | 0.0731        |
|                      | Child + Mother vs.<br>Child | 1.0560 (2)   | 0.5898        |
| rs36228499           | Child vs. Null              | 0.2166 (2)   | 0.8973        |
|                      | Mother vs. Null             | 2.8311 (2)   | 0.2428        |
| <b>CDKN2A</b>        |                             |              |               |
| rs36228834           | Child vs. Null              | 14.4130 (2)  | <b>0.0007</b> |
|                      | Mother vs. Null             | 0.65476 (2)  | 0.7209        |
|                      | Child + Mother vs.<br>Null  | 22.5809 (4)  | 0.0002        |
|                      | Child + Mother vs.<br>Child | 8.1678 (2)   | 0.0168        |

|                        |                          |             |               |
|------------------------|--------------------------|-------------|---------------|
| <b>CDKN2B</b>          |                          |             |               |
| rs36229158             | Child vs. Null           | 5.6281 (2)  | 0.0600        |
|                        | Mother vs. Null          | 1.4635 (2)  | 0.4811        |
|                        | Child + Mother vs. Null  | 13.2885 (4) | 0.0099        |
|                        | Child + Mother vs. Child | 7.6604 (2)  | 0.0217        |
| rs2069416 <sup>1</sup> | Child vs. Null           | 10.1261 (2) | <b>0.0063</b> |
|                        | Mother vs. Null          | 0.9204 (2)  | 0.6312        |
|                        | Child + Mother vs. Null  | 12.3208 (4) | 0.0152        |
|                        | Child + Mother vs. Child | 2.1947 (2)  | 0.3338        |
| rs2069418              | Child vs. Null           | 0.1654 (2)  | 0.9206        |
|                        | Mother vs. Null          | 3.4934 (2)  | 0.1744        |
| <b>E2F1</b>            |                          |             |               |
| rs3213141              | Child vs. Null           | 5.3498 (2)  | 0.0689        |
|                        | Mother vs. Null          | 3.1276 (2)  | 0.2093        |
| <b>HDAC1</b>           |                          |             |               |
| rs1741981              | Child vs. Null           | 4.3556 (2)  | 0.1133        |
|                        | Mother vs. Null          | 0.1855 (2)  | 0.9114        |
| rs36212121             | Child vs. Null           | 3.8760 (2)  | 0.1440        |
|                        | Mother vs. Null          | 0.0251 (2)  | 0.9875        |
| rs36212119             | Child vs. Null           | 0.0436 (2)  | 0.9784        |
|                        | Mother vs. Null          | 1.5479 (2)  | 0.4612        |
| <b>MADH3</b>           |                          |             |               |
| rs36221701             | Child vs. Null           | 0.5317 (2)  | 0.7666        |
|                        | Mother vs. Null          | 1.0401 (2)  | 0.5945        |
| rs36222034             | Child vs. Null           | 5.0971 (2)  | 0.0782        |
|                        | Mother vs. Null          | 5.5164 (2)  | 0.0634        |
| rs11633026             | Child vs. Null           | 0.9712 (2)  | 0.6153        |
|                        | Mother vs. Null          | 0.0025 (2)  | 0.9987        |
| <b>MDM2</b>            |                          |             |               |
| rs1144944              | Child vs. Null           | 1.9874 (2)  | 0.3702        |
|                        | Mother vs. Null          | 0.4247 (2)  | 0.8087        |
| rs3730485              | Child vs. Null           | 0.6397 (2)  | 0.7263        |
|                        | Mother vs. Null          | 0.5579 (2)  | 0.7566        |

|              |                 |            |        |
|--------------|-----------------|------------|--------|
| rs937282     | Child vs. Null  | 0.0355 (2) | 0.9824 |
|              | Mother vs. Null | 1.7830 (2) | 0.4100 |
| rs2279744    | Child vs. Null  | 2.3131 (2) | 0.3146 |
|              | Mother vs. Null | 4.2749 (2) | 0.1180 |
| <b>RB1</b>   |                 |            |        |
| rs1573601    | Child vs. Null  | 0.1689 (2) | 0.9190 |
|              | Mother vs. Null | 0.2512 (2) | 0.8820 |
| <b>TGFB1</b> |                 |            |        |
| rs2317130    | Child vs. Null  | 3.3133 (2) | 0.1908 |
|              | Mother vs. Null | 1.4944 (2) | 0.4737 |
| rs4803457    | Child vs. Null  | 1.0157 (2) | 0.6018 |
|              | Mother vs. Null | 1.5627 (2) | 0.4578 |
| rs11466313   | Child vs. Null  | 2.3172 (2) | 0.3139 |
|              | Mother vs. Null | 1.4790 (2) | 0.4773 |
| rs1800469    | Child vs. Null  | 1.8827 (2) | 0.3901 |
|              | Mother vs. Null | 2.4241 (2) | 0.2976 |

Likelihood-ratio tests were performed in a forward stepwise fashion. The most significant single-step test (Child vs. Null or Mother vs. Null) was tested against a joint effects model in a 2 degree of freedom likelihood-ratio test (Child + Mother vs. Child or Child + Mother vs. Mother). Mating symmetry (i.e. six mating-type parameters) was assumed at all loci but variants rs1144944 and rs3730485 of the *MDM2* gene, as well as *CDKN2B* rs2069416 for which MA models (nine mating-type parameters) were used to test for association. Multiple testing corrections were performed on the single-step association tests using the Benjamini-Hochberg false discovery rate (FDR) method with a type I error rate of 10%; nominal P values are shown, those in bold remain significant after FDR adjustment.

LR Chi2 indicates likelihood-ratio chi-square test; df, degrees of freedom.

<sup>1</sup>*CDKN2B* SNP rs2069416 is tri-allelic A>T,C. For analysis, individuals were grouped according to their T allele such that \*\*>\*T>TT.
