# Supplementary figures and images for: Detection of Fetomaternal Genotype Associations in Early-Onset Disorders: Evaluation of Different Methods and Their Application to Childhood Leukemia
Source: Hindawi journal article supplement (doi:10.1155/2010/369534), 2010-01-01

### Supplementary Figure 1

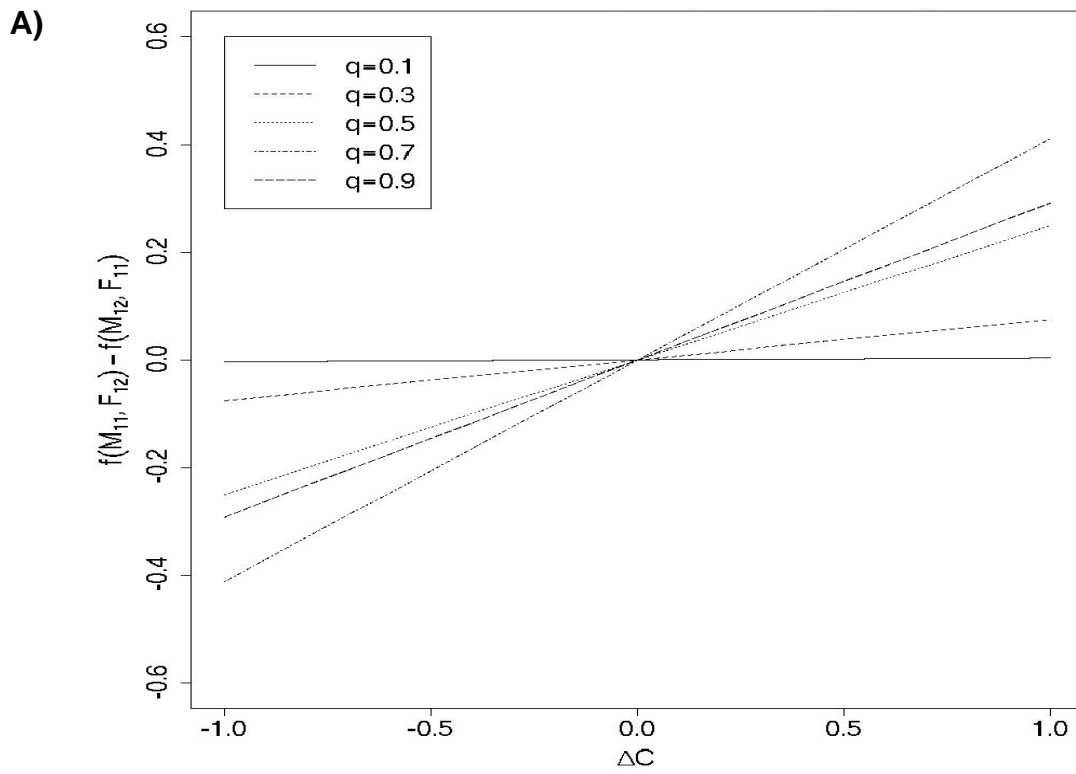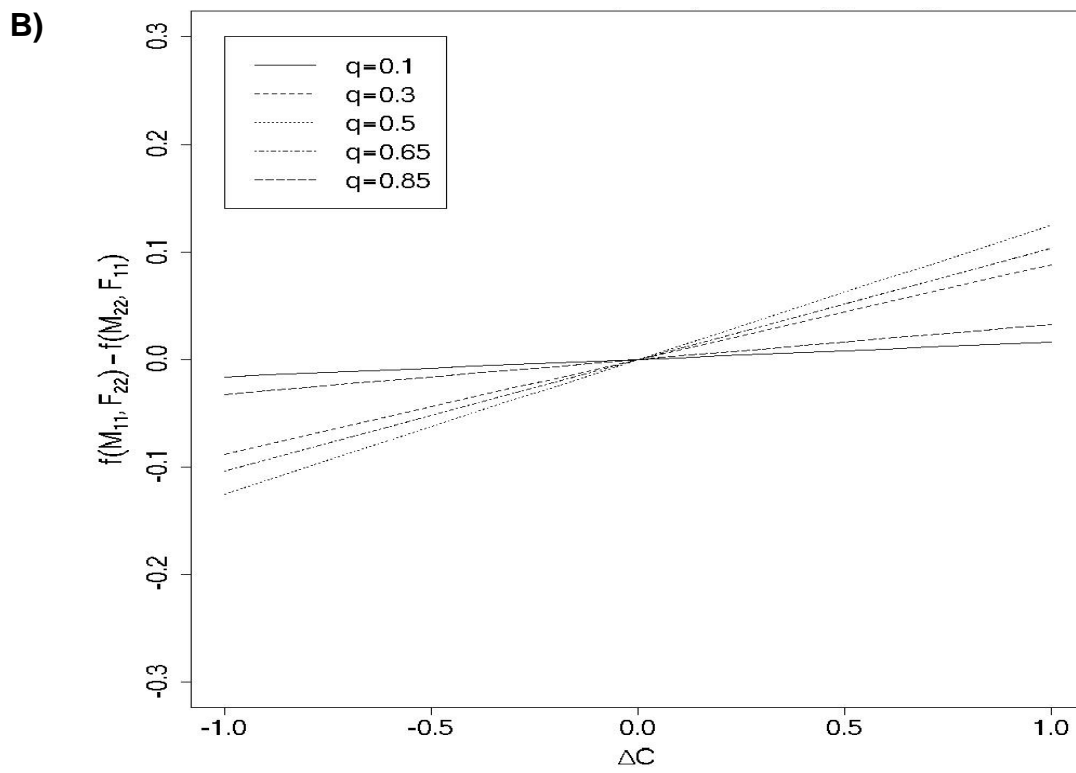

Supplement: f1 [file 369534.f1.pdf]

Supplementary Figure 2

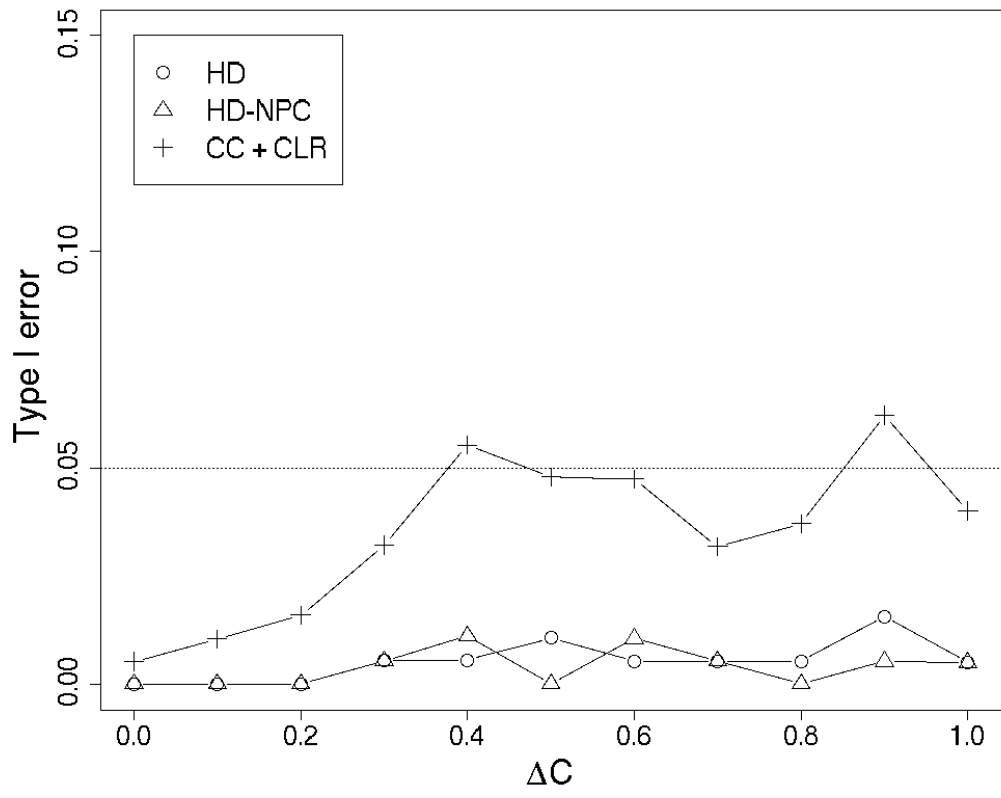

Supplement: f2 [file 369534.f2.pdf]
